# Supplementary material for: Nanostructured lignin carriers for efficient flame retardant delivery in natural rubber composites
Source: Royal Society of Chemistry journal article supplement (doi:10.1039/d5ma01531f), 2026-01-01
Supplement: d5ma01531f1.pdf [file d5ma01531f1.pdf]

## Supplementary Information

### Nanostructured Lignin Carriers for Efficient Flame Retardant Delivery in Natural Rubber Composites

Periklis D. Alikiotis<sup>1</sup>, Tizazu H. Mekonnen<sup>1\*</sup>

<sup>1</sup>*Department of Chemical Engineering, Institute of Polymer Research, Waterloo Institute of Nanotechnology, University of Waterloo, N2L 3G1, Waterloo, ON, Canada*

\*Corresponding author: tmekonnen@uwaterloo.ca.

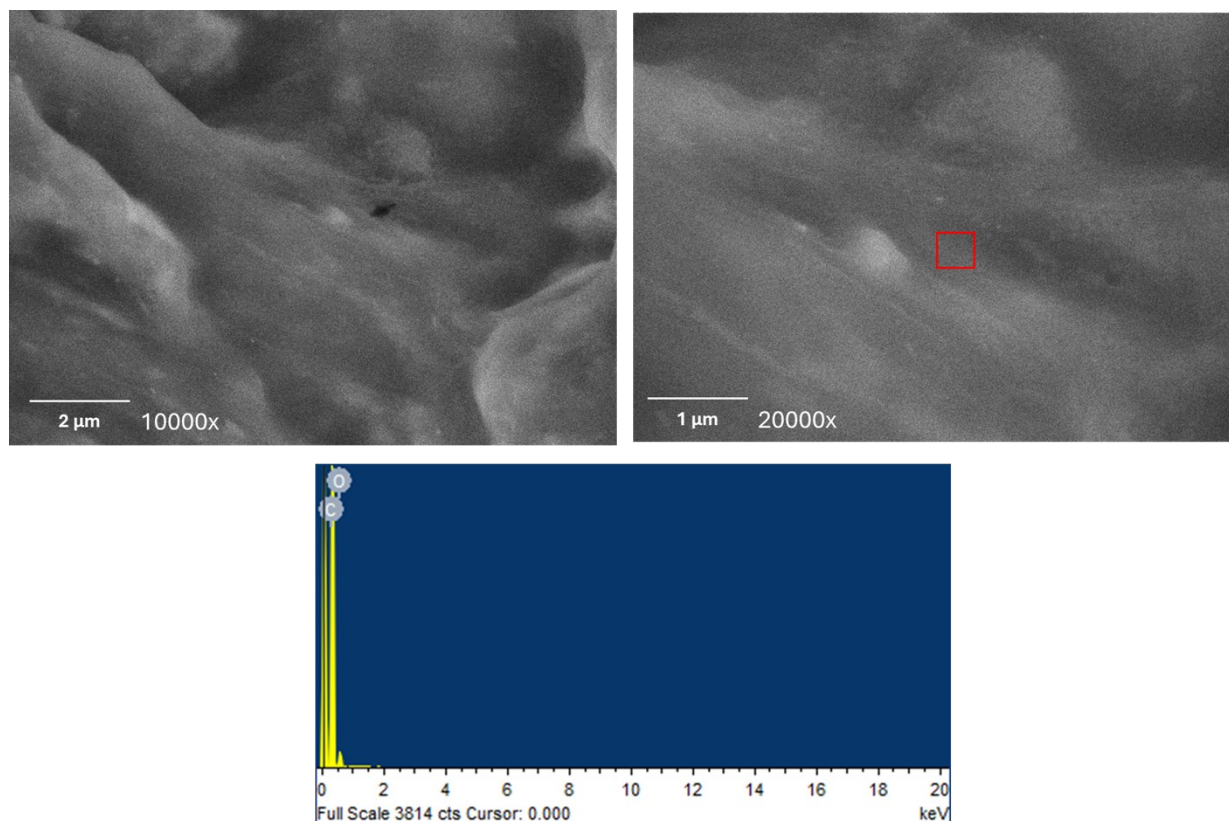

**Figure S1:** E-SEM images of sample N after drying with EDS on area marked in red.

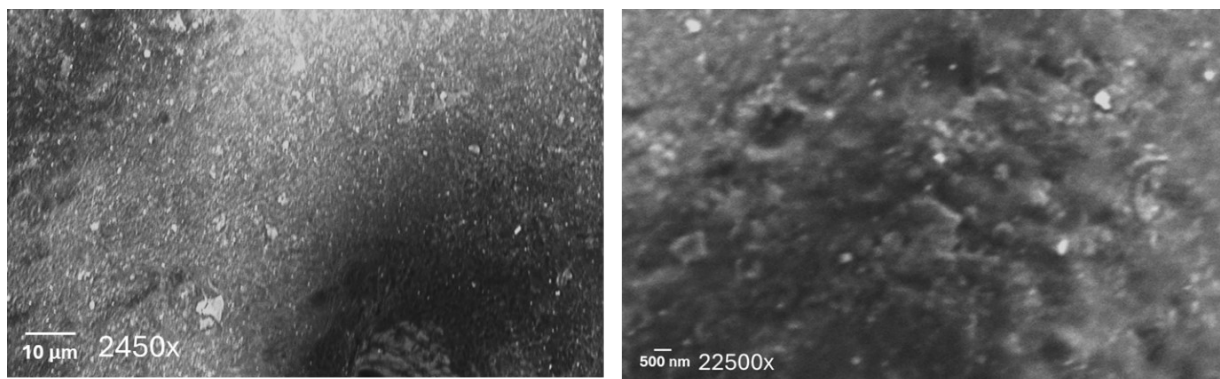

**Figure S2:** E-SEM images of sample 2.5-LNC after drying.

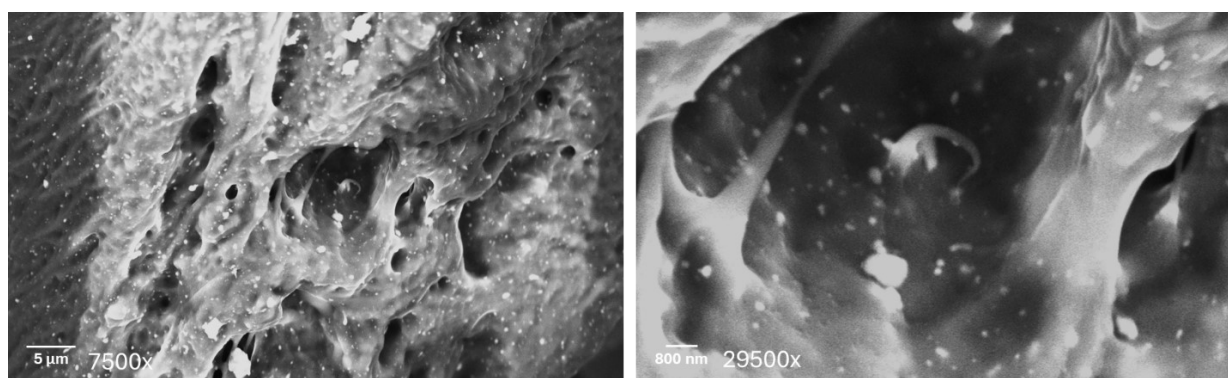

**Figure S3:** E-SEM images of sample 5-LNC after drying.

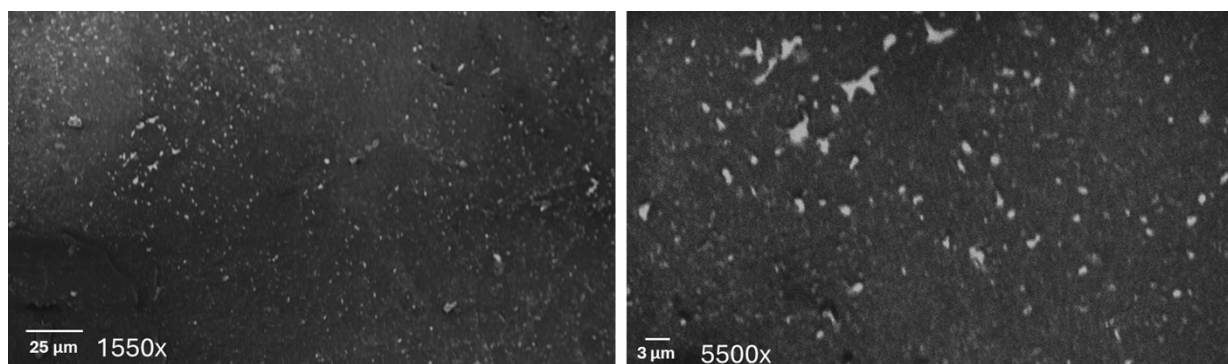

**Figure S4:** E-SEM images of sample 10-LNC after drying.

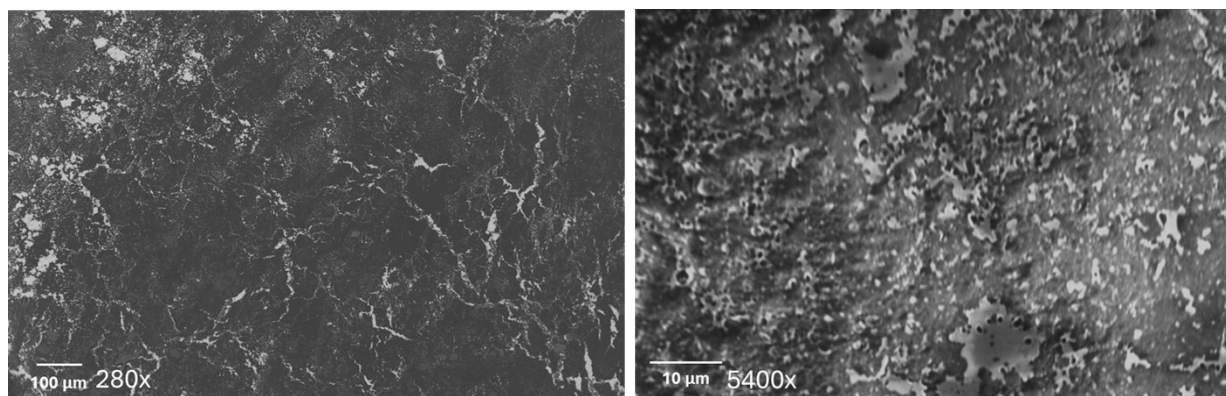

**Figure S5:** E-SEM images of sample 10-L+A after drying.

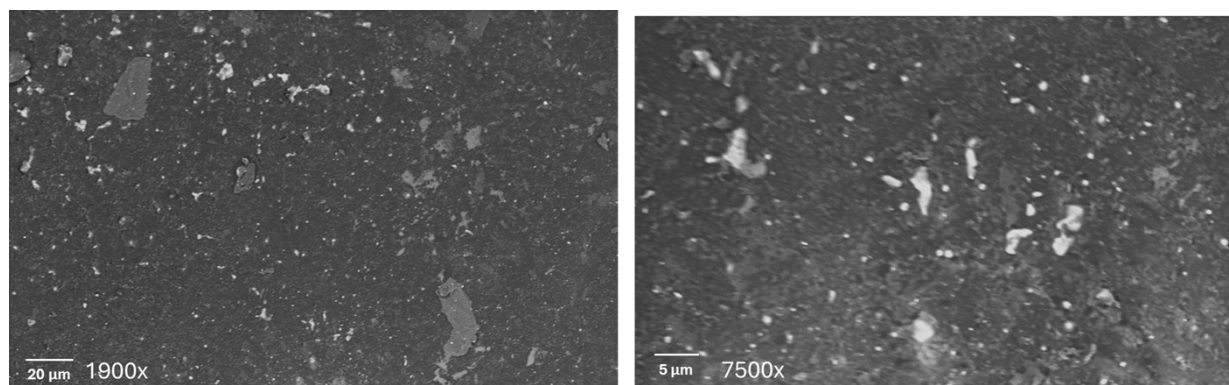

**Figure S6:** E-SEM images of sample 15-LNC after drying.
